# Supplementary material for: Solubility improvement of epalrestat by layered structure formation via cocrystallization
Source: Royal Society of Chemistry journal article supplement (doi:10.1039/c7ce00284j), 2017-01-01
Supplement: c7ce00284j1.pdf [file c7ce00284j1.pdf]

## Electronic Supplementary Information

### **Solubility Improvement of Epalrestat by Layered Structure Formation via Cocrystallization**

Okky Dwichandra Putra,<sup>ab‡</sup> Daiki Umeda,<sup>a‡</sup> Yuda Prasetya Nugraha,<sup>b</sup> Takayuki Furuishi,<sup>a</sup> Hiromasa Nagase,<sup>a</sup> Kaori Fukuzawa,<sup>a</sup> Hidehiro Uekusa,<sup>b\*</sup> and Etsuo Yonemochi<sup>a\*</sup>

<sup>a</sup> School of Pharmacy and Pharmaceutical Sciences, Hoshi University, 2-4-41, Ebara, Shinagawa, Tokyo 142-8501, Japan

<sup>b</sup> Department of Chemistry, School of Science, Tokyo Institute of Technology, 2-12-1, Ookayama, Meguro, Tokyo 152-8551, Japan

<sup>c</sup> Central Research Laboratories, Hoshi University, 2-4-41, Ebara, Shinagawa, Tokyo 142-8501, Japan

\*Corresponding author: uekusa@chem.titech.ac.jp (H. U.) and e-yonemochi@hoshi.ac.jp (E. Y.)

‡These two authors contributed equally

**Table S1.** Hydrogen bond for EPR-DMF solvate

| D-H...A                   | D-H (Å) | H...A (Å) | D...A (Å)  | D-H...A (°) |
|---------------------------|---------|-----------|------------|-------------|
| C17-H17B...O1             | 0.98    | 2.51      | 3.239(2)   | 130.8       |
| C3-H3...S1 <sup>1</sup>   | 0.95    | 2.85      | 3.6609(18) | 144.3       |
| C16-H16B...O1             | 0.98    | 2.51      | 3.195(2)   | 127.0       |
| O3-H3A...O4 <sup>2</sup>  | 0.91(3) | 1.63(3)   | 2.5392(18) | 177(3)      |
| C9-H9B...S1               | 0.98    | 2.60      | 3.2179(18) | 121.4       |
| C10-H10...O1              | 0.99(2) | 2.509(18) | 2.888(2)   | 102.3(12)   |
| C14-H14A...S2             | 0.99    | 2.74      | 3.1269(18) | 103.6       |
| C16-H16C...O4             | 0.98    | 2.36      | 2.771(2)   | 104.5       |
| C18-H18...O2 <sup>3</sup> | 0.98(2) | 2.54(2)   | 3.493(2)   | 165.5(2)    |
| C18-H18...O3 <sup>3</sup> | 0.98(2) | 2.56(3)   | 3.379(3)   | 141.7(2)    |

<sup>1</sup>x-1,y-1,z; <sup>2</sup>-x+2,-y+2,-z+1; <sup>3</sup>x,-1+y,z

**Table S2.** Hydrogen bond for EPR-DMSO solvate

| D-H...A                    | D-H (Å) | H...A (Å) | D...A (Å) | D-H...A (°) |
|----------------------------|---------|-----------|-----------|-------------|
| C14-H14B...O5 <sup>1</sup> | 0.99    | 2.33      | 3.185(3)  | 144.5       |
| C1-H1...O2 <sup>2</sup>    | 0.95    | 2.44      | 3.237(4)  | 140.8       |
| O3-H3A...O4 <sup>3</sup>   | 0.87(4) | 1.72(4)   | 2.572(3)  | 167(4)      |
| O3-H3A...S3 <sup>3</sup>   | 0.87(4) | 2.86(4)   | 3.698(3)  | 164(3)      |
| C19-H19C...O3 <sup>4</sup> | 0.98    | 2.57      | 3.396(4)  | 141.4       |
| C18-H18B...O4              | 0.98    | 2.43      | 3.396(4)  | 167.4       |
| C17-H17B...O5 <sup>1</sup> | 0.98    | 2.60      | 3.410(4)  | 140.6       |
| C16-H16C...O2              | 0.98    | 2.59      | 3.513(4)  | 157.2       |
| C2-H2...O5 <sup>5</sup>    | 0.95    | 2.51      | 3.407(4)  | 157.0       |
| C3-H3...O1 <sup>6</sup>    | 0.95    | 2.59      | 3.313(3)  | 132.9       |
| C9-H9B...S1                | 0.98    | 2.63      | 3.165(3)  | 114.8       |
| C10-H10...O1               | 0.98(3) | 2.50(3)   | 2.891(4)  | 103.3(17)   |
| C14-H14B...O1              | 0.99    | 2.48      | 2.838(3)  | 100.6       |

<sup>1</sup>x-1,y-1,z; <sup>2</sup>-x+1,-y+2,-z+1;<sup>3</sup>-x,-y+1,-z; <sup>4</sup>x+1,y+1,z;<sup>5</sup>-x+2,-y+2,-z+1;

<sup>6</sup>-x+1,-y+1,-z+1

**List of the unsuccessful cofomers used in this study**

- Recorcinol
- Pyrogallol
- Benzoic acid
- 2-hydroxy benzoic acid
- 3-hydroxy benzoic acid
- Nicotinamide
- Isonicotinamide
- Benzamide
- Oxalic acid
- Fumaric acid
- Nicotinic acid
- Isonicotinic acid
- Oxalic acid
- Malonic acid
- Succinic acid
- Glutaric acid
- Adipic acid
- Pimelic acid
- Theophylline
- 8-chlorotheophylline
- Proline
- Glycine
- Arginine
- 2,2'-bipyridine
- 2,3'-bipyridine
- 2,4'-bipyridine
- 3,3'-bipyridine
- 3,4'-bipyridine
- 4,4'-bipyridine
